# Supplementary material
Source: publisher figshare collection journal article supplement (https://diabetesjournals.figshare.com/articles/dataset/_/19182164)
Supplement: Supplementary file 1 [file 1]

**Table S3. IRs, crude and adjusted HRs, and 95% CIs for HRs, of hospital-admitted ischemic stroke between T2D patients with and without GLP-1RAs grouped by cumulative doses during the study period in all GLP-1RAs and each type of GLP-1RAs**

| Variable                  | Person | Event   | Person-Year | IR                 | Crude             |         | Adjusted          |         |
|---------------------------|--------|---------|-------------|--------------------|-------------------|---------|-------------------|---------|
|                           |        | n = 113 |             | 1,000 person-years | HR (95% CI)       | P-value | HR (95% CI)       | P-value |
| <b>GLP-1RAs non-users</b> | 6,534  | 67      | 22,643      | 2.96               | 1 (Reference)     |         | 1 (Reference)     |         |
| <b>GLP-1RAs users</b>     |        |         |             |                    |                   |         |                   |         |
| 1-823 mg                  | 1,643  | 14      | 4,643       | 3.02               | 1.00 (0.56, 1.78) | 0.9957  | 1.02 (0.57, 1.82) | 0.9399  |
| 824-1,784 mg              | 1,626  | 15      | 3,788       | 3.96               | 1.36 (0.77, 2.39) | 0.2851  | 1.42 (0.81, 2.50) | 0.2212  |
| 1,785-6047 mg             | 1,625  | 5       | 5,790       | 0.86               | 0.29 (0.12, 0.73) | 0.0080  | 0.30 (0.12, 0.75) | 0.0102  |
| > 6047 mg                 | 1,640  | 12      | 8,690       | 1.38               | 0.47 (0.25, 0.87) | 0.0166  | 0.46 (0.25, 0.85) | 0.0127  |
| <b><i>Liraglutide</i></b> |        |         |             |                    |                   |         |                   |         |
| 1-2,519 mg                | 686    | 7       | 3,118       | 2.25               | 0.78 (0.36, 1.71) | 0.5390  | 0.75 (0.34, 1.63) | 0.4616  |
| 2,520-6,803 mg            | 702    | 5       | 3,287       | 1.52               | 0.53 (0.21, 1.31) | 0.1683  | 0.56 (0.22, 1.39) | 0.2104  |
| 6,804-14,183 mg           | 696    | 4       | 3,470       | 1.15               | 0.40 (0.14, 1.09) | 0.0740  | 0.41 (0.15, 1.12) | 0.0809  |
| > 14,183 mg               | 695    | 7       | 3,887       | 1.80               | 0.61 (0.28, 1.34) | 0.2167  | 0.58 (0.26, 1.27) | 0.1698  |
| <b><i>Dulaglutide</i></b> |        |         |             |                    |                   |         |                   |         |
| 1-423 mg                  | 890    | 7       | 1,983       | 3.53               | 1.26 (0.57, 2.75) | 0.5674  | 1.31 (0.59, 2.87) | 0.5059  |
| 424-1,175 mg              | 841    | 3       | 1,953       | 1.54               | 0.55 (0.17, 1.74) | 0.3061  | 0.62 (0.19, 1.97) | 0.4166  |
| 1,176-1,754 mg            | 929    | 9       | 3,760       | 4.91               | 1.88 (0.89, 3.98) | 0.0998  | 2.10 (0.98, 4.47) | 0.0549  |
| > 1,754 mg                | 882    |         |             | 0.47               | 0.16 (0.02, 1.16) | 0.0697  | 0.15 (0.02, 1.12) | 0.0647  |
| <b><i>Exenatide</i></b>   |        |         |             |                    |                   |         |                   |         |
| 1-175 mg                  | 281    | 3       | 1,617       | 1.86               | 0.58 (0.18, 1.86) | 0.3596  | 0.63 (0.19, 2.02) | 0.4347  |

|                      |     |   |       |      |                   |        |                   |        |
|----------------------|-----|---|-------|------|-------------------|--------|-------------------|--------|
| <i>176-717 mg</i>    | 284 | 6 | 1,635 | 3.67 | 1.15 (0.50, 2.68) | 0.7397 | 1.26 (0.54, 2.96) | 0.5952 |
| <i>718-2,359 mg</i>  | 282 | 5 | 3,405 | 2.44 | 0.76 (0.28, 2.11) | 0.6016 | 0.98 (0.35, 2.74) | 0.9701 |
| <i>&gt; 2,359 mg</i> | 283 |   |       | 0.57 | 0.17 (0.02, 1.26) | 0.0829 | 0.17 (0.02, 1.21) | 0.0769 |

\*: Adjusted for gender, age, each of comorbidities, and each of concomitant medications listed in Table 1.

Abbreviation: CI, Confidence Interval; GLP-1RAs, Glucagon Like Peptide-1 Receptor Agonists; HR, Hazard Ratio; IR, Incidence Rate; T2D, Type 2 Diabetes.
