# Supplementary material
Source: publisher figshare collection journal article supplement (https://diabetesjournals.figshare.com/articles/dataset/_/19182164)
Supplement: Supplementary file 2 [file 1]

**Table S2. Logistic regression analysis for risk of hospital-admitted ischemic stroke associated with GLP-1RAs use, days of supplies of GLP-1RAs, demographics, comorbidities, and concomitant medications among T2D patients**

| Variable                  | Ischemic stroke |            | Crude               |         | Adjusted*          |         |
|---------------------------|-----------------|------------|---------------------|---------|--------------------|---------|
|                           | No              | Yes        | OR (95% CI)         | P-value | OR (95% CI)        | P-value |
|                           | n (%)           | n (%)      |                     |         |                    |         |
| <b>GLP-1RAs non-users</b> | 6,467 (49.92)   | 67 (59.29) | 1 (Reference)       |         | 1 (Reference)      |         |
| <b>GLP-1RAs users</b>     | 6,488 (50.08)   | 46 (40.71) | 0.68 (0.47, 1.00)   | 0.0486  | 0.69 (0.47, 1.00)  | 0.0523  |
| 1-59 days                 | 1,599 (12.34)   | 18 (15.93) | 1.09 (0.64, 1.83)   | 0.7558  | 1.04 (0.61, 1.76)  | 0.8937  |
| 0-153 days                | 1,614 (12.46)   | 14 (12.39) | 0.84 (0.47, 1.49)   | 0.5473  | 0.88 (0.49, 1.57)  | 0.6533  |
| 154-251 days              | 1,574 (12.15)   | 9 (7.96)   | 0.55 (0.27, 1.11)   | 0.0951  | 0.57 (0.28, 1.15)  | 0.1180  |
| > 251 days                | 1,701 (13.13)   | 5 (4.42)   | 0.28 (0.11, 0.71)   | 0.0067  | 0.28 (0.11, 0.70)  | 0.0063  |
| <b>Sex</b>                |                 |            |                     |         |                    |         |
| Female                    | 6,830 (52.72)   | 53 (46.90) | 1 (Reference)       |         | 1 (Reference)      |         |
| Male                      | 6,125 (47.28)   | 60 (53.10) | 1.26 (0.87, 1.83)   | 0.2184  | 1.36 (0.93, 1.99)  | 0.1148  |
| <b>Age (year)</b>         |                 |            |                     |         |                    |         |
| 20-29                     | 678 (5.23)      | 12 (10.61) | 1 (Reference)       |         | 1 (Reference)      |         |
| 30-39                     | 2,376 (18.34)   |            | 3.14 (0.40, 24.30)  | 0.2741  | 2.67 (0.34, 20.82) | 0.3487  |
| 40-49                     | 3,600 (27.79)   | 22 (19.47) | 4.14 (0.56, 30.72)  | 0.1649  | 3.26 (0.43, 24.51) | 0.2504  |
| 50-59                     | 3,732 (28.81)   | 40 (35.40) | 7.26 (1.00, 52.83)  | 0.0503  | 5.21 (0.70, 38.61) | 0.1064  |
| 60 +                      | 2,569 (19.83)   | 39 (34.51) | 10.28 (1.41, 74.88) | 0.0214  | 6.05 (0.81, 45.23) | 0.0796  |
| <b>Comorbidities</b>      |                 |            |                     |         |                    |         |
| Hypertension              |                 |            |                     |         |                    |         |

|                              |                |              |                   |          |                   |        |
|------------------------------|----------------|--------------|-------------------|----------|-------------------|--------|
| <i>No</i>                    | 4,309 (33.26)  | 11 (9.73)    | 1 (Reference)     |          | 1 (Reference)     |        |
| <i>Yes</i>                   | 8,646 (66.74)  | 102 (90.27)  | 4.62 (2.48, 8.62) | < 0.0001 | 3.66 (1.74, 7.71) | 0.0006 |
| Dyslipidemia                 |                |              |                   |          |                   |        |
| <i>No</i>                    | 1,766 (13.63)  | 17 (15.04)   | 1 (Reference)     |          | 1 (Reference)     |        |
| <i>Yes</i>                   | 11,189 (86.37) | 96 (84.96)   | 0.89 (0.53, 1.50) | 0.6633   | 0.83 (0.47, 1.48) | 0.5255 |
| Smoking                      |                |              |                   |          |                   |        |
| <i>No</i>                    | 12,383 (95.58) | 109 (96.46)  | 1 (Reference)     |          | 1 (Reference)     |        |
| <i>Yes</i>                   | 572 (4.42)     | 4 (3.54)     | 0.79 (0.29, 2.16) | 0.6527   | 0.79 (0.28, 2.18) | 0.6439 |
| Obesity                      |                |              |                   |          |                   |        |
| <i>No</i>                    | 10,299 (79.50) | 91 (80.53)   | 1 (Reference)     |          | 1 (Reference)     |        |
| <i>Yes</i>                   | 2,656 (20.50)  | 22 (19.47)   | 0.94 (0.59, 1.50) | 0.7866   | 1.22 (0.75, 1.98) | 0.4232 |
| Chronic kidney disease       |                |              |                   |          |                   |        |
| <i>No</i>                    | 12,141 (93.72) | 101 (89.38)  | 1 (Reference)     |          | 1 (Reference)     |        |
| <i>Yes</i>                   | 814 (6.28)     | 12 (10.62)   | 1.77 (0.97, 3.24) | 0.0627   | 1.07 (0.57, 2.00) | 0.8279 |
| Antihyperglycemic medication |                |              |                   |          |                   |        |
| Metformin                    |                |              |                   |          |                   |        |
| <i>No</i>                    | 34 (0.26)      | 0 (0.00)     | 1 (Reference)     |          | 1 (Reference)     |        |
| <i>Yes</i>                   | 12,921 (99.74) | 113 (100.00) | NA                | NA       | NA                | NA     |
| Sulfonylureas                |                |              |                   |          |                   |        |
| <i>No</i>                    | 751 (5.80)     | 4 (3.54)     | 1 (Reference)     |          | 1 (Reference)     |        |
| <i>Yes</i>                   | 12,204 (94.20) | 109 (96.46)  | 1.68 (0.62, 4.56) | 0.3112   | 1.11 (0.39, 3.16) | 0.8479 |
| DPP-4 i                      |                |              |                   |          |                   |        |

|                                |                |              |                   |          |                   |          |
|--------------------------------|----------------|--------------|-------------------|----------|-------------------|----------|
| <i>No</i>                      | 1,558 (12.03)  | 20 (17.70)   | 1 (Reference)     |          | 1 (Reference)     |          |
| <i>Yes</i>                     | 11,397 (87.97) | 93 (82.30)   | 0.64 (0.39, 1.03) | 0.0677   | 0.57 (0.34, 0.95) | 0.0293   |
| <b>Thiazolidinediones</b>      |                |              |                   |          |                   |          |
| <i>No</i>                      | 4,835 (37.32)  | 35 (30.97)   | 1 (Reference)     |          | 1 (Reference)     |          |
| <i>Yes</i>                     | 8,120 (62.68)  | 78 (69.03)   | 1.33 (0.89, 1.98) | 0.1662   | 1.12 (0.74, 1.70) | 0.5987   |
| <b>SGLT-2i</b>                 |                |              |                   |          |                   |          |
| <i>No</i>                      | 7,807 (60.26)  | 93 (82.30)   | 1 (Reference)     |          | 1 (Reference)     |          |
| <i>Yes</i>                     | 5,148 (39.74)  | 20 (17.70)   | 0.33 (0.20, 0.53) | < 0.0001 | 0.36 (0.22, 0.58) | < 0.0001 |
| <b>Insulins</b>                |                |              |                   |          |                   |          |
| <i>No</i>                      | 2,876 (22.20)  | 7 (6.19)     | 1 (Reference)     |          | 1 (Reference)     |          |
| <i>Yes</i>                     | 10,079 (77.80) | 106 (93.81)  | 4.32 (2.01, 9.29) | 0.0002   | 4.00 (1.84, 8.70) | 0.0005   |
| <b>Statins</b>                 |                |              |                   |          |                   |          |
| <i>No</i>                      | 2,983 (23.03)  | 27 (23.89)   | 1 (Reference)     |          | 1 (Reference)     |          |
| <i>Yes</i>                     | 9,972 (76.97)  | 86 (76.11)   | 0.95 (0.62, 1.47) | 0.8273   | 0.84 (0.52, 1.37) | 0.4802   |
| <b>Antihypertensive agents</b> |                |              |                   |          |                   |          |
| <i>No</i>                      | 2,514 (19.41)  | 8 (7.08)     | 1 (Reference)     |          | 1 (Reference)     |          |
| <i>Yes</i>                     | 10,441 (80.59) | 105 (92.92)  | 3.16 (1.54, 6.49) | 0.0017   | 1.03 (0.44, 2.43) | 0.9477   |
| <b>Anticoagulants</b>          |                |              |                   |          |                   |          |
| <i>No</i>                      | 12,853 (99.21) | 113 (100.00) | 1 (Reference)     |          | 1 (Reference)     |          |
| <i>Yes</i>                     | 102 (0.79)     |              | 1.13 (0.16, 8.13) | 0.9070   | 0.73 (0.10, 5.34) | 0.7583   |
| <b>Antiplatelets</b>           |                |              |                   |          |                   |          |
| <i>No</i>                      | 11,040 (85.22) | 86 (76.11)   | 1 (Reference)     |          | 1 (Reference)     |          |
| <i>Yes</i>                     | 1,915 (14.78)  | 27 (23.89)   | 1.81 (1.17, 2.80) | 0.0075   | 1.18 (0.75, 1.86) | 0.4657   |

---

\*: Multivariable logistic regression analysis including variables of GLP-1RAs, sex, age, each of comorbidities, and each of concomitant medications listed above.

Abbreviation: CI, Confidence Interval; DDP-4i, Dipeptidyl Peptidase 4 inhibitors; GLP-1RAs, Glucagon Like Peptide-1 Receptor Agonists; OR, Odds Ratio; SGLT2i, Sodium-GLucose coTransporter 2 inhibitor; T2DM, Type 2 Diabetes Mellitus.
