# Supplementary material
Source: publisher figshare collection journal article supplement (https://diabetesjournals.figshare.com/articles/dataset/_/19182164)
Supplement: Supplementary file 3 [file 1]

**Table S1. Baseline characteristics of T2D patients with and without GLP-1RAs stratified by days of supplies of GLP-1RAs**

| Variable         | GLP-1RAs      |                |               |                |               |                |               |                |               |  |
|------------------|---------------|----------------|---------------|----------------|---------------|----------------|---------------|----------------|---------------|--|
|                  | No            | Yes            |               |                |               |                |               |                |               |  |
|                  |               | 1-59 days      |               | 60-153 days    |               | 154-251 days   |               | > 251 days     |               |  |
|                  |               | n (%) / mean ± | P-value       |  |
|                  |               | SD             | SD            | SD             | SD            | SD             | SD            | SD             | SD            |  |
| All              | 6,534 (50.00) |                | 1,617 (12.37) |                | 1,628 (12.46) |                | 1,583 (12.11) |                | 1,706 (13.05) |  |
| Sex              |               |                | 0.2451        |                | 0.1954        |                | 0.9208        |                | 0.6002        |  |
| Female           | 3,435 (52.57) |                | 824 (50.96)   |                | 885 (54.36)   |                | 830 (52.43)   |                | 909 (53.28)   |  |
| Male             | 3,099 (47.43) |                | 793 (49.04)   |                | 743 (45.64)   |                | 753 (47.57)   |                | 797 (46.72)   |  |
| Age group (year) |               |                | 0.0001        |                | 0.0014        |                | 0.2753        |                | 0.5159        |  |
| 20-29            | 322 (4.93)    |                | 92 (5.69)     |                | 111 (6.82)    |                | 74 (4.67)     |                | 80 (4.69)     |  |
| 30-39            | 1,177 (18.01) |                | 276 (17.07)   |                | 333 (20.45)   |                | 291 (18.38)   |                | 310 (18.17)   |  |
| 40-49            | 1,805 (27.62) |                | 418 (25.85)   |                | 441 (27.09)   |                | 463 (29.25)   |                | 495 (29.02)   |  |
| 50-59            | 1,914 (29.29) |                | 425 (26.28)   |                | 453 (27.83)   |                | 473 (29.88)   |                | 507 (29.72)   |  |
| 60 +             | 1,316 (20.14) |                | 406 (25.11)   |                | 290 (17.81)   |                | 282 (17.81)   |                | 314 (18.41)   |  |
| Comorbidities    |               |                |               |                |               |                |               |                |               |  |
| Hypertension     |               |                | 0.8520        |                | 0.5810        |                | 0.1493        |                | 0.6330        |  |
| No               | 2,154 (32.97) |                | 537 (33.21)   |                | 525 (32.25)   |                | 552 (34.87)   |                | 552 (32.36)   |  |
| Yes              | 4,380 (67.03) |                | 1,080 (66.79) |                | 1,103 (67.75) |                | 1,031 (65.13) |                | 1,154 (67.64) |  |
| Dyslipidemia     |               |                | 0.0275        |                | 0.0747        |                | 0.5765        |                | 0.5734        |  |
| No               | 861 (13.18)   |                | 247 (15.28)   |                | 242 (14.86)   |                | 217 (13.71)   |                | 216 (12.66)   |  |

|                        |               |               |               |               |               |
|------------------------|---------------|---------------|---------------|---------------|---------------|
| <i>Yes</i>             | 5,673 (86.82) | 1,370 (84.72) | 1,386 (85.14) | 1,366 (86.29) | 1,490 (87.34) |
| Smoking                |               | 0.3441        | 0.3725        | 0.7258        | 0.6602        |
| <i>No</i>              | 6,254 (95.71) | 1,539 (95.18) | 1,550 (95.21) | 1,512 (95.51) | 1,637 (95.96) |
| <i>Yes</i>             | 280 (4.29)    | 78 (4.82)     | 78 (4.79)     | 71 (4.49)     | 69 (4.04)     |
| Obesity                |               | 0.3261        | 0.0509        | 0.1724        | 0.0039        |
| <i>No</i>              | 5,243 (80.24) | 1,315 (81.32) | 1,271 (78.07) | 1,246 (78.71) | 1,315 (77.08) |
| <i>Yes</i>             | 1,291 (19.76) | 302 (18.68)   | 357 (21.93)   | 337 (21.29)   | 391 (22.92)   |
| Chronic kidney disease |               | 0.0073        | 0.6285        | 0.5378        | 0.5213        |
| <i>No</i>              | 6,140 (93.97) | 1,490 (92.15) | 1,535 (94.29) | 1,481 (93.56) | 1,596 (93.55) |
| <i>Yes</i>             | 394 (6.03)    | 127 (7.85)    | 93 (5.71)     | 102 (6.44)    | 110 (6.45)    |
| Antidiabetic drugs     |               |               |               |               |               |
| Metformin              |               | 0.1205        | 0.8088        | 0.7706        | 0.5456        |
| <i>No</i>              | 14 (0.21)     | 7 (0.43)      | 4 (0.25)      | 4 (0.25)      | 5 (0.29)      |
| <i>Yes</i>             | 6,520 (99.79) | 1,610 (99.57) | 1,624 (99.75) | 1,579 (99.75) | 1,701 (99.71) |
| Sulfonylureas          |               | 0.0581        | 0.4338        | 0.0005        | 0.1415        |
| <i>No</i>              | 353 (5.40)    | 107 (6.62)    | 96 (5.90)     | 122 (7.71)    | 77 (4.51)     |
| <i>Yes</i>             | 6,181 (94.60) | 1,510 (93.38) | 1,532 (94.10) | 1,461 (92.29) | 1,629 (95.49) |
| DPP-4 i                |               | 0.0255        | 0.6854        | 0.0057        | 0.0493        |
| <i>No</i>              | 767 (11.74)   | 158 (9.77)    | 197 (12.10)   | 226 (14.28)   | 230 (13.48)   |
| <i>Yes</i>             | 5,767 (88.26) | 1,459 (90.23) | 1,431 (87.90) | 1,357 (85.72) | 1,476 (86.52) |
| Thiazolidinediones     |               | 0.2277        | 0.1012        | 0.0049        | 0.0247        |
| <i>No</i>              | 2,425 (37.11) | 574 (35.50)   | 640 (39.31)   | 648 (40.93)   | 583 (34.17)   |
| <i>Yes</i>             | 4,109 (62.89) | 1,043 (64.50) | 988 (60.69)   | 935 (59.07)   | 1,123 (65.83) |

|                           |               |               |             |               |             |               |             |               |             |
|---------------------------|---------------|---------------|-------------|---------------|-------------|---------------|-------------|---------------|-------------|
| SGLT-2i                   |               |               | 0.0283      |               | <0.000<br>1 |               | 0.0093      |               | <0.000<br>1 |
| <i>No</i>                 | 3,945 (60.38) | 928 (57.39)   |             | 866 (53.19)   |             | 1,012 (63.93) |             | 1,149 (67.35) |             |
| <i>Yes</i>                | 2,589 (39.62) | 689 (42.61)   |             | 762 (46.81)   |             | 571 (36.07)   |             | 557 (32.65)   |             |
| Insulins                  |               |               | <0.000<br>1 |               | 0.0040      |               | <0.000<br>1 |               | 0.0004      |
| <i>No</i>                 | 1,442 (22.07) | 253 (15.65)   |             | 306 (18.80)   |             | 436 (27.54)   |             | 446 (26.14)   |             |
| <i>Yes</i>                | 5,092 (77.93) | 1,364 (84.35) |             | 1,322 (81.20) |             | 1,147 (72.46) |             | 1,260 (73.86) |             |
| Statins                   |               |               | 0.2960      |               | 0.0719      |               | 0.6101      |               | 0.1271      |
| <i>No</i>                 | 1,488 (22.77) | 388 (24.00)   |             | 405 (24.88)   |             | 370 (23.37)   |             | 359 (21.04)   |             |
| <i>Yes</i>                | 5,046 (77.23) | 1,229 (76.00) |             | 1,223 (75.12) |             | 1,213 (76.63) |             | 1,347 (78.96) |             |
| Antihypertensive agents   |               |               | 0.5387      |               | 0.4300      |               | 0.3709      |               | 0.9610      |
| <i>No</i>                 | 1,252 (19.16) | 299 (18.49)   |             | 326 (20.02)   |             | 319 (20.15)   |             | 326 (19.11)   |             |
| <i>Yes</i>                | 5,282 (80.84) | 1,318 (81.51) |             | 1,302 (79.98) |             | 1,264 (79.85) |             | 1,380 (80.89) |             |
| Anticoagulants            |               |               | 0.0810      |               | 0.4655      |               | 0.9787      |               | 0.4098      |
| <i>No</i>                 | 6,489 (99.31) | 1,599 (98.89) |             | 1,614 (99.14) |             | 1,572 (99.31) |             | 1,691 (99.12) |             |
| <i>Yes</i>                | 45 (0.69)     | 18 (1.11)     |             | 14 (0.86)     |             | 11 (0.69)     |             | 15 (0.88)     |             |
| Antiplatelets             |               |               | 0.0242      |               | 0.1454      |               | 0.0683      |               | 0.4254      |
| <i>No</i>                 | 5,562 (85.12) | 1,340 (82.87) |             | 1,409 (86.55) |             | 1,376 (86.92) |             | 1,439 (84.35) |             |
| <i>Yes</i>                | 972 (14.88)   | 277 (17.13)   |             | 219 (13.45)   |             | 207 (13.08)   |             | 267 (15.65)   |             |
| Follow-up time            | 3.47 ± 1.95   | 3.51 ± 1.82   | 0.4397      | 3.74 ± 1.85   | <0.000<br>1 | 2.97 ± 1.94   | <0.000<br>1 | 3.78 ± 2.11   | <0.000<br>1 |
| Outpatient visit for T2DM | 24.46 ± 19.97 | 26.71 ± 20.99 | <0.000      | 27.81 ± 21.33 | <0.000      | 21.99 ± 19.13 | <0.000      | 30.73 ± 21.93 | <0.000      |

|                                     |   |               |    |               |    |               |    |               |    |
|-------------------------------------|---|---------------|----|---------------|----|---------------|----|---------------|----|
|                                     |   |               | 1  |               | 1  |               | 1  |               | 1  |
| GLP-1RAs prescription refill record | - | 1.65 ± 1.91   | NA | 4.11 ± 1.94   | NA | 7.15 ± 1.16   | NA | 14.19 ± 7.19  | NA |
| Compliance rate for GLP-1RAs        | - | 11.15 ± 14.62 | NA | 26.33 ± 28.91 | NA | 57.44 ± 42.41 | NA | 65.10 ± 73.75 | NA |

All GLP-1RAs users in each group of days' supplies of GLP-1RAs were compared with GLP-1RAs non-users.

Abbreviation: DDP-4i, Dipeptidyl Peptidase 4 inhibitors; GLP-1RAs, Glucagon Like Peptide-1 Receptor Agonists; SD, Standard Deviation; SGLT2i, Sodium-Glucose coTransporter 2 inhibitor; T2D, Type 2 Diabetes.
